# Supplementary material
Source: Springer Nature journal article supplement (https://hal.science/hal-05553470v1/file/12711_2026_1042_MOESM8_ESM.pdf)
Supplement: MOESM8 [file 12711_2026_1042_MOESM8_ESM.pdf]

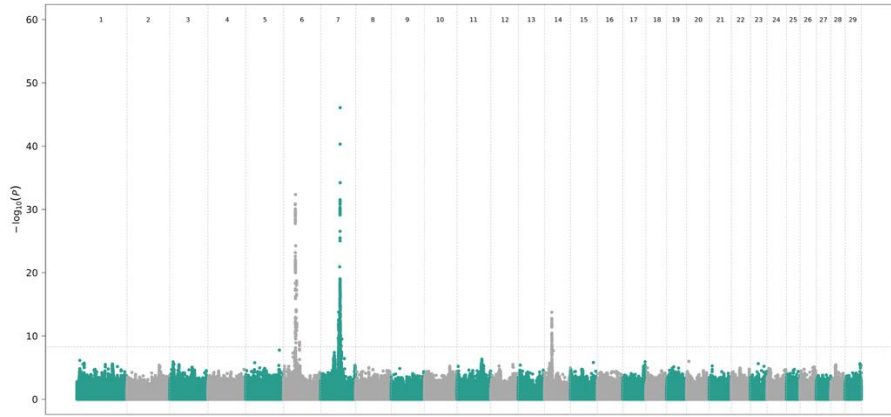

HOL

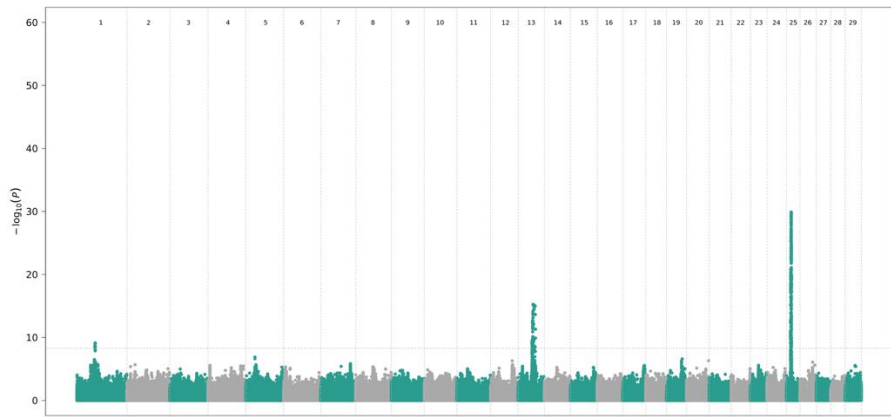

BSW

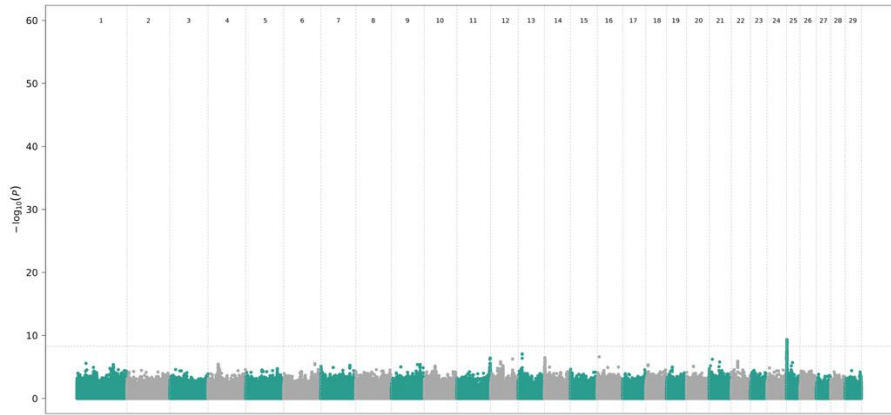

OB

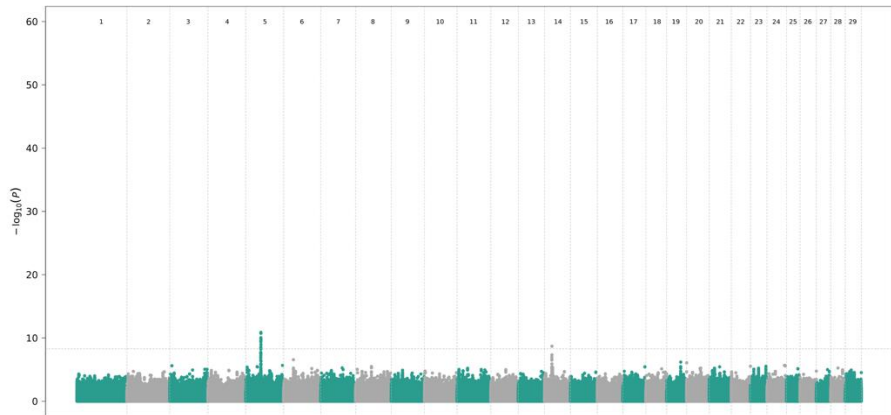

SIM
